# Supplementary material
Source: PubMed Central journal article supplement (PMC9178497)
Supplement: jamasurg-e222065-s001.pdf [file jamasurg-e222065-s001.pdf]

## Supplemental Online Content

Nelson JA, Rubenstein RN, Haglich K, et al. Analysis of a trend reversal in US lumpectomy rates from 2005 through 2017 using 3 nationwide data sets. *JAMA Surg*. Published online June 8, 2022. doi:10.1001/jamasurg.2022.2065

**eTable 1.** CPT Codes

**eTable 2.** Site-Specific Surgery Codes

**eTable 3.** Demographics for Lumpectomy and Mastectomy Patients (2005–2017)

**eTable 4.** Demographics for Lumpectomy Patients in 2011 vs 2017 (NCDB)

**eTable 5.** Demographics for Unilateral Mastectomy and Contralateral Mastectomy Patients (2005–2017)

**eTable 6.** Unilateral Mastectomy and Contralateral Prophylactic Mastectomy Rates

**eTable 7.** NSQIP Demographics for Lumpectomy and Mastectomy Patients (2005–2017)

**eTable 8.** SEER Demographics for Lumpectomy and Mastectomy Patients (2005–2017)

**eTable 9.** NCDB Demographics for Lumpectomy and Mastectomy Patients (2005–2017)

**eTable 10.** NSQIP Demographics for Unilateral Mastectomy and Contralateral Mastectomy Patients (2005–2017)

**eTable 11.** SEER Demographics for Unilateral Mastectomy and Contralateral Mastectomy Patients (2005–2017)

**eTable 12.** NCDB Demographics for Unilateral Mastectomy and Contralateral Mastectomy Patients (2005–2017)

This supplemental material has been provided by the authors to give readers additional information about their work.

**eTable 1: CPT Codes**

| <b>NSQIP</b>      | <b>CPT Codes</b> | <b>Description</b>                                                                                                             |
|-------------------|------------------|--------------------------------------------------------------------------------------------------------------------------------|
| <b>Lumpectomy</b> |                  |                                                                                                                                |
| <b>Procedures</b> | 19120            | Removal of breast lesion                                                                                                       |
|                   | 19125            | Excision of breast lesion                                                                                                      |
|                   | 19140            | Removal of breast tissue                                                                                                       |
|                   | 19160            | Mastectomy, partial                                                                                                            |
|                   | 19162            | Mastectomy, partial, with axillary lymphadenectomy                                                                             |
|                   | 19301            | Mastectomy, partial (e.g., lumpectomy, tylectomy, quadrantectomy, segmentectomy)                                               |
|                   | 19302            | Mastectomy, partial (e.g., lumpectomy, tylectomy, quadrantectomy, segmentectomy); with axillary lymphadenectomy                |
| <b>Mastectomy</b> |                  |                                                                                                                                |
| <b>Procedures</b> | 19180            | Mastectomy, simple, complete                                                                                                   |
|                   | 19182            | Mastectomy, subcutaneous                                                                                                       |
|                   | 19200            | Mastectomy, radical, including pectoral muscles, axillary lymph nodes                                                          |
|                   | 19220            | Mastectomy, radical, including pectoral muscles, axillary, and internal mammary lymph nodes                                    |
|                   | 19240            | Mastectomy, modified radical, including axillary lymph nodes, with/without pectoralis minor muscle, excluding pectoralis major |
|                   | 19303            | Mastectomy, simple, complete                                                                                                   |
|                   | 19304            | Mastectomy, subcutaneous                                                                                                       |
|                   | 19305            | Mastectomy, radical, including pectoral muscles, axillary lymph nodes                                                          |
|                   | 19306            | Mastectomy, radical, including pectoral muscles, axillary and internal mammary lymph nodes                                     |
|                   | 19307            | Mastectomy, radical, including pectoral muscles, axillary and internal mammary lymph nodes                                     |

**eTable 2: Site-Specific Surgery Codes**

| SEER/NCDB                    | Site-Specific Surgery Codes | Description                                                                    |
|------------------------------|-----------------------------|--------------------------------------------------------------------------------|
| <b>Lumpectomy Procedures</b> |                             |                                                                                |
|                              | 20                          | Partial mastectomy, NOS; less than total mastectomy, NOS                       |
|                              | 21                          | Partial mastectomy WITH nipple resection                                       |
|                              | 22                          | Lumpectomy or excisional biopsy                                                |
|                              | 24                          | Segmental mastectomy (including wedge resection, quadrantectomy, tylectomy)    |
| <b>Mastectomy Procedures</b> |                             |                                                                                |
| Laterality Not Specified     |                             |                                                                                |
|                              | 30                          | Subcutaneous mastectomy                                                        |
|                              | 40                          | Total (simple) mastectomy                                                      |
|                              | 50                          | Modified radical mastectomy                                                    |
|                              | 60                          | Radical mastectomy, NOS                                                        |
|                              | 70                          | Extended radical mastectomy                                                    |
|                              | 80                          | Mastectomy, NOS                                                                |
| <b>Unilateral Mastectomy</b> |                             |                                                                                |
|                              | 41                          | Total (simple) mastectomy WITHOUT removal of uninvolved contralateral breast   |
|                              | 51                          | Modified radical mastectomy WITHOUT removal of uninvolved contralateral breast |
|                              | 61                          | Radical mastectomy, NOS, WITHOUT removal of uninvolved contralateral breast    |
|                              | 71                          | Extended radical mastectomy WITHOUT removal of uninvolved contralateral breast |

|                                       |    |                                                                                                                                 |
|---------------------------------------|----|---------------------------------------------------------------------------------------------------------------------------------|
|                                       | 43 | Total (simple) mastectomy WITHOUT removal of uninvolved contralateral breast with reconstruction NOS                            |
|                                       | 44 | Total (simple) mastectomy WITHOUT removal of uninvolved contralateral breast with reconstruction, Tissue                        |
|                                       | 45 | Total (simple) mastectomy WITHOUT removal of uninvolved contralateral breast with reconstruction, Implant                       |
|                                       | 46 | Total (simple) mastectomy WITHOUT removal of uninvolved contralateral breast with reconstruction, Combined (Tissue and Implant) |
|                                       | 53 | Modified radical mastectomy WITHOUT removal of uninvolved contralateral breast, Reconstruction, NOS                             |
|                                       | 54 | Modified radical mastectomy WITHOUT removal of uninvolved contralateral breast, Reconstruction, Tissue                          |
|                                       | 55 | Modified radical mastectomy WITHOUT removal of uninvolved contralateral breast, Reconstruction, Implant                         |
|                                       | 56 | Modified radical mastectomy WITHOUT removal of uninvolved contralateral breast, Reconstruction, Combined (Tissue and Implant)   |
|                                       | 64 | Radical mastectomy WITHOUT removal of uninvolved contralateral breast, Reconstruction, NOS                                      |
|                                       | 65 | Radical mastectomy WITHOUT removal of uninvolved contralateral breast, Reconstruction, Tissue                                   |
|                                       | 66 | Radical mastectomy WITHOUT removal of uninvolved contralateral breast, Reconstruction, Implant                                  |
|                                       | 67 | Radical mastectomy WITHOUT removal of uninvolved contralateral breast, Reconstruction, Combined (Tissue and Implant)            |
| Contralateral Prophylactic Mastectomy |    |                                                                                                                                 |
|                                       | 42 | 42 Total (simple) mastectomy WITH removal of uninvolved contralateral breast                                                    |
|                                       | 52 | Modified radical mastectomy WITH removal of uninvolved contralateral breast                                                     |
|                                       | 62 | Radical mastectomy, NOS, WITH removal of uninvolved contralateral breast                                                        |
|                                       | 72 | Extended radical mastectomy WITH removal of uninvolved contralateral breast                                                     |

|       |    |                                                                                                                              |
|-------|----|------------------------------------------------------------------------------------------------------------------------------|
|       | 47 | Total (simple) mastectomy WITH removal of uninvolved contralateral breast with reconstruction NOS                            |
|       | 48 | Total (simple) mastectomy WITH removal of uninvolved contralateral breast with reconstruction, Tissue                        |
|       | 49 | Total (simple) mastectomy WITH removal of uninvolved contralateral breast with reconstruction, Implant                       |
|       | 75 | Total (simple) mastectomy WITH removal of uninvolved contralateral breast with reconstruction, Combined (Tissue and Implant) |
|       | 57 | Modified radical mastectomy WITH removal of uninvolved contralateral breast, Reconstruction, NOS                             |
|       | 58 | Modified radical mastectomy WITH removal of uninvolved contralateral breast, Reconstruction, Tissue                          |
|       | 59 | Modified radical mastectomy WITH removal of uninvolved contralateral breast, Reconstruction, Implant                         |
|       | 63 | Modified radical mastectomy WITH removal of uninvolved contralateral breast, Reconstruction, Combined (Tissue and Implant)   |
|       | 68 | Radical mastectomy WITH removal of uninvolved contralateral breast, Reconstruction, NOS                                      |
|       | 69 | Radical mastectomy WITH removal of uninvolved contralateral breast, Reconstruction, Tissue                                   |
|       | 73 | Radical mastectomy WITH removal of uninvolved contralateral breast, Reconstruction, Implant                                  |
|       | 74 | Radical mastectomy WITH removal of uninvolved contralateral breast, Reconstruction, Combined (Tissue and Implant)            |
| Other |    |                                                                                                                              |
|       | 76 | 76 Bilateral mastectomy for a single tumor involving both breasts, as for bilateral inflammatory carcinoma                   |

**eTable 3: Demographics for Lumpectomy and Mastectomy Patients (2005–2017)**

| <b>NSQIP</b> |                                  |                         |                         |         |                      |
|--------------|----------------------------------|-------------------------|-------------------------|---------|----------------------|
| Variable     |                                  | Lumpectomy<br>(230,855) | Mastectomy<br>(138,791) | p-value | Odds Ratio (95% CI)  |
| Age*         | <40                              | 12.2% (28,153)          | 9.35% (12,956)          | < 0.001 | 1.349 (1.319, 1.379) |
|              | 40–49                            | 19.4% (44,677)          | 22.3% (30,904)          | < 0.001 | 0.837 (0.824, 0.851) |
|              | 50–59                            | 24.0% (55,399)          | 26.2% (36,270)          | < 0.001 | 0.892 (0.878, 0.906) |
|              | 60–69                            | 23.9% (55,066)          | 22.8% (31,525)          | < 0.001 | 1.065 (1.049, 1.082) |
|              | 70–79                            | 14.6% (33,773)          | 13.1% (18,205)          | < 0.001 | 1.135 (1.113, 1.157) |
|              | ≥80                              | 5.85% (13,483)          | 6.28% (8,705)           | < 0.001 | 0.927 (0.901, 0.953) |
| Race         | White                            | 70.2% (162,030)         | 72.0% (99,971)          | < 0.001 | 0.914 (0.901, 0.928) |
|              | Black/African American           | 12.1% (27,816)          | 10.0% (13,976)          | < 0.001 | 1.223 (1.197, 1.25)  |
|              | Asian or Pacific Islander        | 5.18% (11,947)          | 5.18% (7,184)           | = 0.994 | 1 (0.97, 1.03)       |
|              | American Indian or Alaska Native | 0.60% (1,394)           | 0.49% (691)             | < 0.001 | 1.214 (1.107, 1.332) |
|              | Other/Unknown                    | 11.9% (27,668)          | 12.2% (16,969)          | = 0.029 | 0.978 (0.958, 0.998) |
| Ethnicity    | Hispanic/Spanish                 | 7.01% (16,175)          | 5.66% (7,851)           | < 0.001 | 1.257 (1.222, 1.292) |
|              | Non-Hispanic/Spanish             | 83.5% (192,859)         | 84.4% (117,093)         | < 0.001 | 0.941 (0.924, 0.958) |
|              | Unknown                          | 9.45% (21,821)          | 9.98% (13,847)          | < 0.001 | 0.942 (0.921, 0.963) |
| <b>SEER</b>  |                                  |                         |                         |         |                      |
| Variable     |                                  | Lumpectomy<br>(418,183) | Mastectomy<br>(372,444) | p-value | Odds Ratio (95% CI)  |
| Age          | <40                              | 2.50% (10,457)          | 6.94% (25,846)          | < 0.001 | 0.344 (0.336, 0.352) |
|              | 40–49                            | 14.2% (59,150)          | 20.5% (76,400)          | < 0.001 | 0.638 (0.631, 0.646) |
|              | 50–59                            | 24.7% (103,261)         | 24.9% (93,038)          | = 0.003 | 0.985 (0.975, 0.995) |
|              | 60–69                            | 28.6% (119,468)         | 23.6% (87,923)          | < 0.001 | 1.294 (1.281, 1.307) |
|              | 70–79                            | 20.0% (83,721)          | 15.6% (58,038)          | < 0.001 | 1.356 (1.34, 1.372)  |

|             |                                   |                           |                           |         |                      |
|-------------|-----------------------------------|---------------------------|---------------------------|---------|----------------------|
|             | ≥80                               | 10.1% (42,126)            | 8.38% (31,199)            | < 0.001 | 1.225 (1.207, 1.244) |
| Race        | White                             | 80.7% (337,576)           | 78.2% (291,235)           | < 0.001 | 1.168 (1.155, 1.181) |
|             | Black/African American            | 10.3% (42,980)            | 11.1% (41,252)            | < 0.001 | 0.92 (0.907, 0.933)  |
|             | Asian or Pacific Islander         | 7.82% (32,720)            | 9.67% (36,003)            | < 0.001 | 0.793 (0.781, 0.806) |
|             | American Indian or Alaska Native  | 0.52% (2,169)             | 0.59% (2,183)             | < 0.001 | 0.884 (0.833, 0.939) |
|             | Other/Unknown                     | 0.66% (2,738)             | 0.48% (1,771)             | < 0.001 | 1.379 (1.299, 1.465) |
| Ethnicity   | Hispanic/Spanish                  | 10.3% (43,003)            | 11.3% (41,918)            | < 0.001 | 0.904 (0.891, 0.917) |
|             | Non-Hispanic/Spanish              | 89.7% (375,180)           | 88.8% (330,526)           | < 0.001 | 1.106 (1.091, 1.122) |
| <b>NCDB</b> |                                   |                           |                           |         |                      |
| Variable    |                                   | Lumpectomy<br>(1,263,733) | Mastectomy<br>(1,043,146) | p-value | Odds Ratio (95% CI)  |
| Age         | <40                               | 2.36% (29,861)            | 7.37% (76,922)            | < 0.001 | 0.304 (0.3, 0.308)   |
|             | 40–49                             | 13.8% (174,748)           | 20.9% (218,338)           | < 0.001 | 0.606 (0.602, 0.61)  |
|             | 50–59                             | 24.7% (311,905)           | 25.3% (263,376)           | < 0.001 | 0.97 (0.964, 0.976)  |
|             | 60–69                             | 29.2% (369,309)           | 23.6% (246,496)           | < 0.001 | 1.334 (1.327, 1.342) |
|             | 70–79                             | 20.4% (258,245)           | 15.2% (158,360)           | < 0.001 | 1.435 (1.425, 1.445) |
|             | ≥80                               | 9.47% (119,665)           | 7.64% (79,654)            | < 0.001 | 1.265 (1.253, 1.277) |
| Race        | White                             | 84.0% (1,061,740)         | 82.6% (861,280)           | < 0.001 | 1.11 (1.102, 1.118)  |
|             | Black/African American            | 10.8% (136,346)           | 11.4% (119,219)           | < 0.001 | 0.937 (0.93, 0.945)  |
|             | Asian/Pacific Islander            | 3.15% (39,827)            | 3.92% (40,932)            | < 0.001 | 0.797 (0.786, 0.808) |
|             | American Indian, Aleutian, Eskimo | 0.25% (3,145)             | 0.29% (3,106)             | < 0.001 | 0.835 (0.795, 0.878) |
|             | Other/Unknown                     | 1.79% (22,675)            | 1.78% (18,609)            | < 0.001 | 1.006 (0.986, 1.036) |
| Ethnicity   | Hispanic/Spanish                  | 4.97% (62,745)            | 5.76% (60,094)            | < 0.001 | 0.855 (0.845, 0.865) |
|             | Non-Hispanic/Spanish              | 90.4% (1,142,535)         | 89.4% (932,497)           | < 0.001 | 1.119 (1.109, 1.128) |
|             | Unknown                           | 4.63% (58,453)            | 4.85% (50,555)            | < 0.001 | 0.952 (0.941, 0.964) |

\*As NSQIP patients with missing age data were still included, total number of patients is lower based on age variable compared to race and ethnicity. Abbreviations: NSQIP, National Surgical Quality Improvement Program; SEER, Surveillance, Epidemiology, and End Results Program; NCDB, National Cancer Database

**eTable 4: Demographics for Lumpectomy Patients in 2011 vs 2017 (NCDB)**

| Variable          |                                        | 2011  | 2017  | p-value |
|-------------------|----------------------------------------|-------|-------|---------|
| Age               | <40                                    | 2.18% | 1.88% | < 0.001 |
|                   | 40–49                                  | 13.9% | 11.2% | < 0.001 |
|                   | 50–59                                  | 24.9% | 23.0% | < 0.001 |
|                   | 60–69                                  | 29.5% | 32.2% | < 0.001 |
|                   | 70–79                                  | 19.5% | 23.7% | < 0.001 |
|                   | ≥80                                    | 10.1% | 8.03% | < 0.001 |
| Race              | White                                  | 84.1% | 82.3% | < 0.001 |
|                   | Black                                  | 10.9% | 11.2% | =0.065  |
|                   | Asian/Pacific Islander                 | 3.05% | 4.05% | < 0.001 |
|                   | American Indian, Aleutian, or Eskimo   | 0.25% | 0.32% | =0.009  |
|                   | Other/Unknown                          | 1.67% | 2.12% | < 0.001 |
| Ethnicity         | Hispanic/Spanish                       | 4.83% | 5.84% | < 0.001 |
|                   | Non-Hispanic/Spanish                   | 90.5% | 92.1% | < 0.001 |
|                   | Unknown                                | 4.64% | 2.06% | < 0.001 |
| Facility Type     | Academic/Research Program              | 29.3% | 32.2% | < 0.001 |
|                   | Community Center                       | 9.47% | 8.86% | < 0.001 |
|                   | Comprehensive Community Cancer Program | 44.6% | 42.5% | < 0.001 |
|                   | Integrated Network Cancer Programs     | 14.5% | 14.6% | =0.689  |
|                   | Unknown                                | 2.18% | 1.88% | < 0.001 |
| Facility Location | East North Central                     | 17.3% | 17.2% | =0.610  |
|                   | East South Central                     | 5.26% | 5.67% | < 0.001 |
|                   | Middle Atlantic                        | 17.2% | 16.2% | < 0.001 |
|                   | Mountain                               | 4.35% | 4.61% | =0.004  |

|                                    |                                |       |       |         |
|------------------------------------|--------------------------------|-------|-------|---------|
|                                    | New England                    | 6.60% | 6.50% | =0.349  |
|                                    | Pacific                        | 11.7% | 11.9% | =0.054  |
|                                    | South Atlantic                 | 21.7% | 21.8% | =0.332  |
|                                    | West North Central             | 6.83% | 6.96% | =0.256  |
|                                    | West South Central             | 6.94% | 7.25% | =0.005  |
|                                    | Unknown                        | 2.18% | 1.88% | < 0.001 |
| Area Population Density            | Metro                          | 85.9% | 86.2% | =0.112  |
|                                    | Urban                          | 10.4% | 10.7% | =0.035  |
|                                    | Rural                          | 1.29% | 1.21% | =0.079  |
|                                    | Unknown                        | 2.34% | 1.90% | < 0.001 |
| Insurance/Payor                    | Private Insurance/Managed Care | 51.2% | 46.9% | < 0.001 |
|                                    | Medicaid                       | 5.08% | 5.21% | =0.177  |
|                                    | Medicare                       | 39.6% | 44.7% | < 0.001 |
|                                    | Other Government               | 0.89% | 1.09% | < 0.001 |
|                                    | Not Insured                    | 1.66% | 1.18% | < 0.001 |
|                                    | Unknown                        | 1.58% | 0.92% | < 0.001 |
| Median Income Quartile             | <\$38,000                      | 12.5% | 11.5% | < 0.001 |
|                                    | \$38,000–\$47,999              | 18.8% | 17.0% | < 0.001 |
|                                    | \$48,000–\$62,999              | 24.1% | 22.7% | = 0.935 |
|                                    | >\$63,000                      | 35.8% | 33.6% | < 0.001 |
|                                    | Unknown                        | 8.79% | 15.2% | < 0.001 |
| Charlson-Deyo<br>Comorbidity Index | 0                              | 84.5% | 82.8% | < 0.001 |
|                                    | 1                              | 12.6% | 12.2% | =0.003  |
|                                    | 2                              | 2.29% | 3.09% | < 0.001 |
|                                    | 3+                             | 0.59% | 1.88% | < 0.001 |

|                      |                              |       |       |         |
|----------------------|------------------------------|-------|-------|---------|
| Tumor Behavior       | Invasive/Malignant           | 77.0% | 79.7% | < 0.001 |
|                      | In situ                      | 22.9% | 20.3% | < 0.001 |
| Tumor Grade          | 1                            | 24.1% | 25.1% | < 0.001 |
|                      | 2                            | 39.0% | 42.6% | = 0.369 |
|                      | 3                            | 26.2% | 25.0% | < 0.001 |
|                      | 4                            | 0.49% | 0.17% | < 0.001 |
|                      | Unknown                      | 10.2% | 7.11% | < 0.001 |
| Histology            | Ductal and Lobular Neoplasms | 91.7% | 92.4% | < 0.001 |
|                      | Adenomas and Adenocarcinomas | 4.98% | 4.40% | < 0.001 |
|                      | Epithelial Neoplasms NOS     | 0.48% | 0.39% | =0.002  |
|                      | Squamous Cell Neoplasms      | 0.46% | 0.42% | =0.189  |
|                      | Neoplasms NOS                | 0.06% | 0.03% | =0.021  |
|                      | Other                        | 2.33% | 2.34% | =0.785  |
| Radiation-Surgery    | Neoadjuvant                  | 0.17% | 0.29% | < 0.001 |
| Sequence             | Adjuvant                     | 77.4% | 71.9% | < 0.001 |
|                      | None                         | 21.3% | 25.8% | < 0.001 |
|                      | Other/Unknown                | 1.10% | 2.05% | < 0.001 |
| Chemotherapy-Surgery | Neoadjuvant                  | 3.32% | 4.57% | < 0.001 |
| Sequence             | Adjuvant                     | 67.2% | 66.3% | < 0.001 |
|                      | None                         | 25.8% | 21.1% | =0.052  |
|                      | Other/Unknown                | 3.66% | 8.11% | < 0.001 |
| ER Status            | Positive                     | 79.9% | 83.5% | < 0.001 |
| PR Status            | Positive                     | 70.1% | 73.1% | < 0.001 |
| HER2 Status          | Positive                     | 8.75% | 9.29% | < 0.001 |
| Hormonal Status      | Triple Negative              | 8.80% | 7.81% | < 0.001 |

|                         |                               |        |       |         |
|-------------------------|-------------------------------|--------|-------|---------|
| Combination Results     | ER/PR Positive, HER2 Negative | 50.2%  | 53.9% | < 0.001 |
|                         | Triple Positive               | 4.56%  | 4.96% | < 0.001 |
| Clinical T Stage        | 0                             | 0.40%  | 0.04% | < 0.001 |
|                         | In Situ                       | 20.8%  | 20.2% | < 0.001 |
|                         | 1                             | 53.0%  | 56.7% | < 0.001 |
|                         | 2                             | 14.6%  | 15.5% | < 0.001 |
|                         | 3                             | 1.12%  | 1.19% | =0.135  |
|                         | 4                             | 0.44%  | 0.36% | =0.003  |
|                         | Unknown                       | 9.61%  | 6.02% | < 0.001 |
| Clinical N Stage        | 0                             | 85.3%  | 90.2% | < 0.001 |
|                         | Micrometastases               | 0.00%  | 0.00% |         |
|                         | 1                             | 5.58%  | 5.59% | =0.880  |
|                         | 2                             | 0.75%  | 0.51% | < 0.001 |
|                         | 3                             | 0.33%  | 0.29% | =0.055  |
|                         | Other/Unknown                 | 7.99%  | 3.40% | < 0.001 |
| Clinical M Stage        | No metastases                 | 92.9%  | 97.1% | < 0.001 |
|                         | Micrometastases               | 0.006% | 0.02% | =0.014  |
|                         | Macrometastases               | 0.69%  | 0.35% | < 0.001 |
|                         | Unknown                       | 6.30%  | 2.52% | < 0.001 |
| Overall Clinical Cancer | 0                             | 21.7%  | 20.4% | < 0.001 |
| Stage                   | 1                             | 50.5%  | 54.4% | < 0.001 |
|                         | 2                             | 16.4%  | 17.4% | < 0.001 |
|                         | 3                             | 1.62%  | 1.43% | < 0.001 |
|                         | 4                             | 0.68%  | 0.35% | < 0.001 |
|                         | Unknown                       | 9.15%  | 6.01% | < 0.001 |

Abbreviations: NSQIP, National Surgical Quality Improvement Program; NOS, not otherwise specified; ER, estrogen receptor; PR, progesterone receptor; T, tumor; N, node; M, metastasis

**eTable 5: Demographics for Unilateral Mastectomy and Contralateral Mastectomy Patients (2005–2017)**

| <b>NSQIP</b> |                                  |                                    |                                                         |         |                      |
|--------------|----------------------------------|------------------------------------|---------------------------------------------------------|---------|----------------------|
| Variable     |                                  | Unilateral Mastectomy<br>(101,131) | Contralateral<br>Prophylactic<br>Mastectomy<br>(35,312) | p-value | Odds Ratio (95% CI)  |
| Age*         | <40                              | 7.33% (7,396)                      | 13.4% (4,728)                                           | < 0.001 | 0.511 (0.492, 0.532) |
|              | 40–49                            | 19.2% (19,389)                     | 30.4% (10,723)                                          | < 0.001 | 0.545 (0.53, 0.561)  |
|              | 50–59                            | 25.2% (25,413)                     | 29.2% (10,309)                                          | < 0.001 | 0.816 (0.794, 0.839) |
|              | 60–69                            | 24.3% (24,563)                     | 19.3% (6,802)                                           | < 0.001 | 1.348 (1.308, 1.39)  |
|              | 70–79                            | 15.7% (15,874)                     | 6.56% (2,315)                                           | < 0.001 | 2.66 (2.542, 2.785)  |
|              | ≥80                              | 8.20% (8,277)                      | 1.21% (428)                                             | < 0.001 | 7.281 (6.6, 8.048)   |
| Race         | White                            | 69.8% (70,577)                     | 77.6% (27,409)                                          | < 0.001 | 0.666 (0.647, 0.685) |
|              | Black/African American           | 11.1% (11,204)                     | 7.63% (2,694)                                           | < 0.001 | 1.508 (1.443, 1.577) |
|              | Asian or Pacific Islander        | 5.80% (5,867)                      | 3.60% (1,272)                                           | < 0.001 | 1.648 (1.549, 1.755) |
|              | American Indian or Alaska Native | 0.56% (569)                        | 0.32% (112)                                             | < 0.001 | 1.778 (1.449, 2.198) |
|              | Other/Unknown                    | 12.8% (12,914)                     | 10.8% (3,825)                                           | < 0.001 | 1.205 (1.16, 1.252)  |
| Ethnicity    | Hispanic/Spanish                 | 5.89% (5,963)                      | 5.08% (1,793)                                           | < 0.001 | 1.171 (1.109, 1.237) |
|              | Non-Hispanic/Spanish             | 83.7% (84,599)                     | 86.2% (30,434)                                          | < 0.001 | 0.82 (0.792, 0.849)  |
|              | Unknown                          | 10.5% (10,569)                     | 8.74% (3,085)                                           | < 0.001 | 1.219 (1.169, 1.272) |
| <b>SEER</b>  |                                  |                                    |                                                         |         |                      |
| Variable     |                                  | Unilateral Mastectomy<br>(239,074) | Contralateral<br>Prophylactic<br>Mastectomy<br>(90,781) | p-value | Odds Ratio (95% CI)  |
| Age          | <40                              | 4.84% (11,564)                     | 12.7% (11,554)                                          | < 0.001 | 0.349 (0.339, 0.358) |
|              | 40–49                            | 16.7% (40,031)                     | 30.7% (27,865)                                          | < 0.001 | 0.454 (0.446, 0.462) |

|             |                                   |                                    |                                                          |         |                      |
|-------------|-----------------------------------|------------------------------------|----------------------------------------------------------|---------|----------------------|
|             | 50–59                             | 23.7% (56,611)                     | 28.7% (26,052)                                           | < 0.001 | 0.771 (0.758, 0.784) |
|             | 60–69                             | 25.2% (60,124)                     | 19.6% (17,807)                                           | < 0.001 | 1.377 (1.351, 1.403) |
|             | 70–79                             | 18.8% (44,827)                     | 6.89% (6,250)                                            | < 0.001 | 3.121 (3.036, 3.209) |
|             | ≥80                               | 10.8% (25,917)                     | 1.38% (1,253)                                            | < 0.001 | 8.688 (8.205, 9.206) |
| Race        | White                             | 76.3% (182,324)                    | 83.9% (76,172)                                           | < 0.001 | 0.616 (0.604, 0.629) |
|             | Black                             | 11.9% (28,602)                     | 8.64% (7,845)                                            | < 0.001 | 1.437 (1.399, 1.475) |
|             | Asian or Pacific Islander         | 10.8% (25,754)                     | 6.39% (5,805)                                            | < 0.001 | 1.767 (1.716, 1.821) |
|             | American Indian or Alaska Native  | 0.59% (1,414)                      | 0.58% (530)                                              | = 0.819 | 1.013 (0.916, 1.122) |
|             | Other/Unknown                     | 0.41% (980)                        | 0.47% (429)                                              | = 0.015 | 0.867 (0.773, 0.974) |
| Ethnicity   | Hispanic/Spanish                  | 11.7% (27,897)                     | 9.78% (8,876)                                            | < 0.001 | 1.219 (1.189, 1.25)  |
|             | Non-Hispanic/Spanish              | 88.3% (211,177)                    | 90.2% (81,905)                                           | < 0.001 | 0.82 (0.8, 0.841)    |
| <b>NCDB</b> |                                   |                                    |                                                          |         |                      |
| Variable    |                                   | Unilateral Mastectomy<br>(582,611) | Contralateral<br>Prophylactic<br>Mastectomy<br>(291,494) | p-value | Odds Ratio (95% CI)  |
| Age         | <40                               | 5.07% (29,536)                     | 12.9% (37,469)                                           | < 0.001 | 0.362 (0.356, 0.368) |
|             | 40–49                             | 16.9% (99,021)                     | 30.4% (88,577)                                           | < 0.001 | 0.469 (0.464, 0.474) |
|             | 50–59                             | 23.9% (139,399)                    | 28.8% (83,871)                                           | < 0.001 | 0.779 (0.771, 0.786) |
|             | 60–69                             | 25.4% (147,813)                    | 19.7% (57,420)                                           | < 0.001 | 1.386 (1.371, 1.401) |
|             | 70–79                             | 18.5% (107,951)                    | 6.99% (20,393)                                           | < 0.001 | 3.023 (2.976, 3.072) |
|             | ≥80                               | 10.1% (58,891)                     | 1.29% (3,764)                                            | < 0.001 | 8.597 (8.316, 8.891) |
| Race        | White                             | 80.9% (471,316)                    | 86.9% (253,440)                                          | < 0.001 | 0.636 (0.628, 0.644) |
|             | Black                             | 12.7% (73,725)                     | 8.28% (24,132)                                           | < 0.001 | 1.605 (1.581, 1.63)  |
|             | Asian/Pacific Islander            | 4.45% (25,922)                     | 2.77% (8,073)                                            | < 0.001 | 1.635 (1.581, 1.63)  |
|             | American Indian, Aleutian, Eskimo | 0.30% (1,769)                      | 0.27% (792)                                              | = 0.009 | 1.118 (1.027, 1.217) |

|           |                      |                 |                 |         |                      |
|-----------|----------------------|-----------------|-----------------|---------|----------------------|
|           | Other/Unknown        | 1.70% (9,879)   | 1.74% (5,057)   | = 0.183 | 0.977 (0.944, 1.011) |
| Ethnicity | Hispanic/Spanish     | 6.01% (35,031)  | 4.86% (14,157)  | < 0.001 | 1.253 (1.228, 1.279) |
|           | Non-Hispanic/Spanish | 89.2% (519,839) | 90.8% (264,563) | < 0.001 | 0.843 (0.83, 0.856)  |
|           | Unknown              | 4.76% (27,741)  | 4.38% (12,774)  | < 0.001 | 1.091 (1.068, 1.115) |

\*As NSQIP patients with missing age data were still included, total number of patients is lower based on age variable compared to race and ethnicity.  
Abbreviations: No., number; NSQIP, National Surgical Quality Improvement Program; SEER, Surveillance, Epidemiology, and End Results Program; NCDB, National Cancer Database

**eTable 6: Unilateral Mastectomy and Contralateral Prophylactic Mastectomy Rates**

|        | Year            | Total No. of Mastectomies                    | No. of Unilateral Mastectomies               | Unilateral Mastectomy Rate                   | No. of Contralateral Prophylactic Mastectomies | Contralateral Prophylactic Mastectomy Rate |
|--------|-----------------|----------------------------------------------|----------------------------------------------|----------------------------------------------|------------------------------------------------|--------------------------------------------|
| NSQIP* | 2005            | 973                                          | 883                                          | 907.5                                        | 90                                             | 92.5                                       |
|        | 2006            | 3,234                                        | 2,719                                        | 840.8                                        | 515                                            | 159.2                                      |
|        | 2007            | 6,292                                        | 5,125                                        | 814.5                                        | 1,167                                          | 185.5                                      |
|        | 2008            | 8,071                                        | 6,507                                        | 806.2                                        | 1,564                                          | 193.8                                      |
|        | 2009            | 9,795                                        | 7,570                                        | 772.8                                        | 2,225                                          | 227.2                                      |
|        | 2010            | 9,596                                        | 7,426                                        | 773.9                                        | 2,170                                          | 226.1                                      |
|        | 2011            | 9,881                                        | 7,775                                        | 786.9                                        | 2,106                                          | 213.1                                      |
|        | 2012            | 12,083                                       | 9,038                                        | 748.0                                        | 3,045                                          | 252.0                                      |
|        | 2013            | 14,000                                       | 9,677                                        | 691.2                                        | 4,323                                          | 308.8                                      |
|        | 2014            | 14,331                                       | 10,102                                       | 704.9                                        | 4,229                                          | 295.1                                      |
|        | 2015            | 15,340                                       | 10,837                                       | 706.5                                        | 4,503                                          | 293.5                                      |
|        | 2016            | 16,353                                       | 11,641                                       | 711.9                                        | 4,712                                          | 288.1                                      |
|        | 2017            | 16,494                                       | 11,831                                       | 717.3                                        | 4,663                                          | 282.7                                      |
|        |                 | Overall Trend                                | IRR, 0.984: 95% CI, 0.980 – 0.989: p < 0.001 |                                              | IRR, 1.048: 95% CI, 1.033 – 1.064: p < 0.001   |                                            |
|        | Trend 2005–2013 | IRR, 0.976: 95% CI, 0.968 – 0.984: p < 0.001 |                                              | IRR, 1.087: 95% CI, 1.063 – 1.111: p < 0.001 |                                                |                                            |
|        | Trend 2013–2017 | IRR, 1.008: 95% CI, 1.006 – 1.011: p < 0.001 |                                              | IRR, 0.980: 95% CI, 0.975 – 0.985: p < 0.001 |                                                |                                            |
| SEER** | 2005            | 22,163                                       | 19,065                                       | 860.2                                        | 3,098                                          | 139.8                                      |
|        | 2006            | 23,173                                       | 19,408                                       | 837.5                                        | 3,765                                          | 162.5                                      |
|        | 2007            | 24,903                                       | 20,011                                       | 803.6                                        | 4,892                                          | 196.4                                      |

|        |                 |                                              |        |                                              |        |       |
|--------|-----------------|----------------------------------------------|--------|----------------------------------------------|--------|-------|
|        | 2008            | 26,048                                       | 20,245 | 777.2                                        | 5,803  | 222.8 |
|        | 2009            | 27,084                                       | 20,514 | 757.4                                        | 6,570  | 242.6 |
|        | 2010            | 26,520                                       | 19,548 | 737.1                                        | 6,972  | 262.9 |
|        | 2011            | 26,627                                       | 18,993 | 713.3                                        | 7,634  | 286.7 |
|        | 2012            | 27,344                                       | 19,016 | 695.4                                        | 8,328  | 304.6 |
|        | 2013            | 27,579                                       | 18,087 | 655.8                                        | 9,492  | 344.2 |
|        | 2014            | 25,985                                       | 16,792 | 646.2                                        | 9,193  | 353.8 |
|        | 2015            | 25,127                                       | 16,410 | 653.1                                        | 8,717  | 346.9 |
|        | 2016            | 23,762                                       | 15,511 | 652.8                                        | 8,251  | 347.2 |
|        | 2017            | 23,540                                       | 15,474 | 657.3                                        | 8,066  | 342.7 |
|        | Overall Trend   | IRR, 0.975: 95% CI, 0.970 – 0.979: p < 0.001 |        | IRR, 1.071: 95% CI, 1.052 – 1.090: p < 0.001 |        |       |
|        | Trend 2005–2013 | IRR, 0.968: 95% CI, 0.966 – 0.971: p < 0.001 |        | IRR, 1.107: 95% CI, 1.094 – 1.121: p < 0.001 |        |       |
|        | Trend 2013–2017 | IRR, 1.001: 95% CI, 0.997 – 1.005: p < 0.001 |        | IRR, 0.998: 95% CI, 0.991 – 1.004: p = 0.471 |        |       |
| NCDB** | 2005            | 48,918                                       | 39,832 | 814.3                                        | 9,086  | 185.7 |
|        | 2006            | 52,262                                       | 41,347 | 791.1                                        | 10,915 | 208.9 |
|        | 2007            | 58,904                                       | 44,292 | 751.9                                        | 14,612 | 248.1 |
|        | 2008            | 63,750                                       | 45,998 | 721.5                                        | 17,752 | 278.5 |
|        | 2009            | 68,252                                       | 48,044 | 703.9                                        | 20,208 | 296.1 |
|        | 2010            | 69,126                                       | 47,548 | 687.8                                        | 21,578 | 312.2 |
|        | 2011            | 71,579                                       | 47,563 | 664.5                                        | 24,016 | 335.5 |
|        | 2012            | 74,358                                       | 47,471 | 638.4                                        | 26,887 | 361.6 |
|        | 2013            | 77,634                                       | 47,427 | 610.9                                        | 30,207 | 389.1 |
|        | 2014            | 76,013                                       | 45,632 | 600.3                                        | 30,381 | 399.7 |
|        | 2015            | 74,052                                       | 43,956 | 593.6                                        | 30,096 | 406.4 |

|                                                                                                                                                                                                     |                 |        |                                              |       |                                              |       |
|-----------------------------------------------------------------------------------------------------------------------------------------------------------------------------------------------------|-----------------|--------|----------------------------------------------|-------|----------------------------------------------|-------|
|                                                                                                                                                                                                     | 2016            | 70,966 | 42,622                                       | 600.6 | 28,344                                       | 399.4 |
|                                                                                                                                                                                                     | 2017            | 68,291 | 40,879                                       | 598.6 | 27,412                                       | 401.4 |
|                                                                                                                                                                                                     | Overall Trend   |        | IRR, 0.972: 95% CI, 0.968 – 0.977: p < 0.001 |       | IRR, 1.059: 95% CI, 1.044 – 1.074: p < 0.001 |       |
|                                                                                                                                                                                                     | Trend 2005–2013 |        | IRR, 0.966: 95% CI, 0.964 – 0.967: p < 0.001 |       | IRR, 1.087: 95% CI, 1.075 – 1.099: p < 0.001 |       |
|                                                                                                                                                                                                     | Trend 2013–2017 |        | IRR, 0.996: 95% CI, 0.992 – 0.999: p = 0.042 |       | IRR, 1.006: 95% CI, 1.000 – 1.013: p = 0.044 |       |
| <p>*No. of mastectomies excluding bilateral prophylactic mastectomies<br/> **No. of mastectomies with laterality specified in the database<br/> Rates are expressed per 1000 total mastectomies</p> |                 |        |                                              |       |                                              |       |

Abbreviations: No., number; NSQIP, National Surgical Quality Improvement Program; SEER, Surveillance, Epidemiology, and End Results Program; NCDB, National Cancer Database; IRR, incidence rate ratio

**eTable 7: NSQIP Demographics for Lumpectomy and Mastectomy Patients (2005–2017)**

| Variable           |                                  | Lumpectomy      | Mastectomy      | p-value | Odds Ratio (95% CI)     |
|--------------------|----------------------------------|-----------------|-----------------|---------|-------------------------|
| Age                | <40                              | 12.2% (28,153)  | 9.35% (12,956)  | < 0.001 | 1.349 (1.319, 1.379)    |
|                    | 40–49                            | 19.4% (44,677)  | 22.3% (30,904)  | < 0.001 | 0.837 (0.824, 0.851)    |
|                    | 50–59                            | 24.0% (55,399)  | 26.2% (36,270)  | < 0.001 | 0.892 (0.878, 0.906)    |
|                    | 60–69                            | 23.9% (55,066)  | 22.8% (31,525)  | < 0.001 | 1.065 (1.049, 1.082)    |
|                    | 70–79                            | 14.6% (33,773)  | 13.1% (18,205)  | < 0.001 | 1.135 (1.113, 1.157)    |
|                    | ≥80                              | 5.85% (13,483)  | 6.28% (8,705)   | < 0.001 | 0.927 (0.901, 0.953)    |
| Race               | White                            | 70.2% (162,030) | 72.0% (99,971)  | < 0.001 | 0.914 (0.901, 0.928)    |
|                    | Black/African American           | 12.1% (27,816)  | 10.1% (13,976)  | < 0.001 | 1.223 (1.197, 1.25)     |
|                    | Asian or Pacific Islander        | 5.18% (11,947)  | 5.18% (7,184)   | = 0.994 | 1 (0.97, 1.03)          |
|                    | American Indian or Alaska Native | 0.60% (1,394)   | 0.49% (691)     | < 0.001 | 1.214 (1.107, 1.332)    |
|                    | Other/Unknown                    | 11.9% (27,668)  | 12.2% (16,969)  | = 0.029 | 0.978 (0.958, 0.998)    |
| Ethnicity          | Hispanic/Spanish                 | 7.01% (16,175)  | 5.66% (7,851)   | < 0.001 | 1.257 (1.222, 1.292)    |
|                    | Non-Hispanic/Spanish             | 83.5% (192,859) | 84.4% (117,093) | < 0.001 | 0.941 (0.924, 0.958)    |
|                    | Unknown                          | 9.45% (21,821)  | 9.98% (13,847)  | < 0.001 | 0.942 (0.921, 0.963)    |
| Procedure Status   | Inpatient                        | 5.26% (12,150)  | 58.8% (81,621)  | < 0.001 | 0.039 (0.038, 0.04)     |
|                    | Outpatient                       | 94.8% (218,705) | 41.2% (57,170)  | < 0.001 | 25.684 (25.136, 26.265) |
| ASA Classification | 1                                | 13.2% (30,244)  | 6.23% (8,634)   | < 0.001 | 2.289 (2.233, 2.347)    |
|                    | 2                                | 59.2% (135,617) | 59.6% (82,667)  | = 0.007 | 0.981 (0.968, 0.995)    |
|                    | 3                                | 26.5% (60,830)  | 32.8% (45,417)  | < 0.001 | 0.742 (0.731, 0.753)    |
|                    | 4                                | 1.09% (2,490)   | 1.39% (1,920)   | < 0.001 | 0.782 (0.736, 0.831)    |
|                    | 5                                | 0.00% (9)       | 0.00% (3)       | = 0.553 | 1.815 (0.453, 10.422)   |

\*As NSQIP patients with missing age data were still included, total number of patients is lower based on age variable compared to race and ethnicity. Abbreviations: No., number; NSQIP, National Surgical Quality Improvement Program

**eTable 8: SEER Demographics for Lumpectomy and Mastectomy Patients (2005–2017)**

| Variable                |                                  | Lumpectomy      | Mastectomy      | p-value | Odds Ratio (95% CI)  |
|-------------------------|----------------------------------|-----------------|-----------------|---------|----------------------|
| Age                     | <40                              | 2.50% (10,457)  | 6.94% (25,846)  | < 0.001 | 0.344 (0.336, 0.352) |
|                         | 40–49                            | 14.2% (59,150)  | 20.5% (76,400)  | < 0.001 | 0.638 (0.631, 0.646) |
|                         | 50–59                            | 24.7% (103,261) | 24.9% (93,038)  | = 0.003 | 0.985 (0.975, 0.995) |
|                         | 60–69                            | 28.6% (119,468) | 23.6% (87,923)  | < 0.001 | 1.294 (1.281, 1.307) |
|                         | 70–79                            | 20.0% (83,721)  | 15.6% (58,038)  | < 0.001 | 1.356 (1.34, 1.372)  |
|                         | ≥80                              | 10.1% (42,126)  | 8.38% (31,199)  | < 0.001 | 1.225 (1.207, 1.244) |
| Race                    | White                            | 80.7% (337,576) | 78.2% (291,235) | < 0.001 | 1.168 (1.155, 1.181) |
|                         | Black                            | 10.3% (42,980)  | 11.1% (41,252)  | < 0.001 | 0.92 (0.907, 0.933)  |
|                         | Asian or Pacific Islander        | 7.82% (32,720)  | 9.67% (36,003)  | < 0.001 | 0.793 (0.781, 0.806) |
|                         | American Indian or Alaska Native | 0.52% (2,169)   | 0.59% (2,183)   | < 0.001 | 0.884 (0.833, 0.939) |
|                         | Other/Unknown                    | 0.66% (2,738)   | 0.48% (1,771)   | < 0.001 | 1.379 (1.299, 1.465) |
| Ethnicity               | Hispanic/Spanish                 | 10.3% (43,003)  | 11.3% (41,918)  | < 0.001 | 0.904 (0.891, 0.917) |
|                         | Non-Hispanic/Spanish             | 89.7% (375,180) | 88.8% (330,526) | < 0.001 | 1.106 (1.091, 1.122) |
| Area Population Density | Metro                            | 91.1% (380,839) | 89.1% (331,715) | < 0.001 | 1.252 (1.234, 1.271) |
|                         | Urban                            | 5.27% (22,045)  | 6.36% (23,667)  | < 0.001 | 0.82 (0.805, 0.836)  |
|                         | Rural                            | 3.56% (14,904)  | 4.46% (16,597)  | < 0.001 | 0.792 (0.775, 0.811) |
|                         | Unknown/Alaska/Hawaii            | 0.09% (395)     | 0.13% (465)     | < 0.001 | 0.756 (0.66, 0.867)  |
| Median Income Quartile  | <\$40,000                        | 3.06% (12,812)  | 4.57% (17,003)  | < 0.001 | 0.661 (0.645, 0.676) |
|                         | \$40,000–\$49,999                | 10.4% (43,668)  | 11.6% (43,276)  | < 0.001 | 0.887 (0.874, 0.899) |
|                         | \$50,000–\$59,999                | 17.3% (72,133)  | 18.4% (68,490)  | < 0.001 | 0.925 (0.914, 0.936) |
|                         | \$60,000–\$69,999                | 28.9% (120,678) | 28.9% (107,978) | = 0.189 | 0.994 (0.984, 1.003) |

|                     |                               |                 |                 |         |                      |
|---------------------|-------------------------------|-----------------|-----------------|---------|----------------------|
|                     | >\$70,000                     | 40.4% (168,823) | 36.4% (135,640) | < 0.001 | 1.182 (1.171, 1.193) |
|                     | Unknown                       | 0.02% (69)      | 0.02% (57)      | = 0.721 | 1.078 (0.748, 1.559) |
| Tumor Behavior      | Malignant                     | 77.3% (323,115) | 84.3% (313,934) | < 0.001 | 0.633 (0.626, 0.641) |
|                     | In situ                       | 22.7% (95,068)  | 15.7% (58,510)  | < 0.001 | 1.579 (1.561, 1.597) |
| Tumor Grade         | 1                             | 23.7% (98,964)  | 15.4% (57,208)  | < 0.001 | 1.708 (1.689, 1.728) |
|                     | 2                             | 40.3% (168,420) | 39.9% (148,852) | = 0.005 | 1.013 (1.004, 1.022) |
|                     | 3                             | 26.4% (110,306) | 35.6% (132,536) | < 0.001 | 0.649 (0.642, 0.655) |
|                     | 4                             | 1.38% (5,754)   | 1.72% (6,408)   | < 0.001 | 0.797 (0.769, 0.826) |
|                     | Unknown                       | 8.31% (34,739)  | 7.37% (27,440)  | < 0.001 | 1.139 (1.12, 1.158)  |
| Histology           | Ductal and Lobular Neoplasms  | 91.6% (382,984) | 93.2% (347,026) | < 0.001 | 0.797 (0.784, 0.81)  |
|                     | Adenomas and Adenocarcinomas  | 5.06% (21,165)  | 3.15% (11,736)  | < 0.001 | 1.638 (1.601, 1.677) |
|                     | Epithelial Neoplasms NOS      | 0.42% (1,766)   | 0.71% (2,661)   | < 0.001 | 0.589 (0.555, 0.626) |
|                     | Squamous Cell Neoplasms       | 0.29% (1,229)   | 0.22% (799)     | < 0.001 | 1.371 (1.253, 1.501) |
|                     | Neoplasms NOS                 | 0.08% (313)     | 0.14% (502)     | < 0.001 | 0.555 (0.48, 0.64)   |
|                     | Other                         | 2.57% (10,726)  | 2.61% (9,720)   | = 0.212 | 0.982 (0.955, 1.01)  |
| ER Status           | Positive                      | 78.8% (329,535) | 73.8% (274,981) | < 0.001 | 1.318 (1.304, 1.331) |
| PR Status           | Positive                      | 68.1% (284,942) | 62.0% (231,047) | < 0.001 | 1.309 (1.297, 1.321) |
| HER2 Status         | Positive                      | 6.17% (25,815)  | 9.36% (34,848)  | < 0.001 | 0.637 (0.627, 0.648) |
| Hormonal Status     | Triple Negative               | 4.92% (20,562)  | 6.38% (23,761)  | < 0.001 | 0.759 (0.744, 0.774) |
| Combination Results | ER/PR Positive, HER2 Negative | 34.1% (142,545) | 29.8% (111,077) | < 0.001 | 1.217 (1.205, 1.228) |
|                     | Triple Positive               | 3.29% (13,776)  | 4.37% (16,273)  | < 0.001 | 0.746 (0.728, 0.763) |
| T Stage             | 0                             | 0.03% (122)     | 0.11% (412)     | < 0.001 | 0.263 (0.214, 0.323) |
|                     | In Situ                       | 22.8% (95,313)  | 15.9% (59,175)  | < 0.001 | 1.563 (1.545, 1.581) |
|                     | 1                             | 55.7% (232,929) | 39.6% (147,480) | < 0.001 | 1.918 (1.901, 1.935) |

|                      |                 |                 |                 |         |                      |
|----------------------|-----------------|-----------------|-----------------|---------|----------------------|
|                      | 2               | 18.3% (76,439)  | 29.4% (109,541) | < 0.001 | 0.537 (0.531, 0.543) |
|                      | 3               | 1.37% (5,743)   | 8.19% (30,536)  | < 0.001 | 0.156 (0.152, 0.16)  |
|                      | 4               | 0.64% (2,654)   | 4.71% (17,547)  | < 0.001 | 0.129 (0.124, 0.135) |
|                      | Unknown         | 1.19% (4,983)   | 2.08% (7,753)   | < 0.001 | 0.567 (0.547, 0.588) |
| N Stage              | 0               | 83.4% (348,733) | 63.4% (236,176) | < 0.001 | 2.897 (2.867, 2.928) |
|                      | Micrometastases | 2.71% (11,338)  | 3.98% (14,837)  | < 0.001 | 0.672 (0.655, 0.689) |
|                      | 1               | 10.1% (42,228)  | 19.3% (71,793)  | < 0.001 | 0.47 (0.464, 0.477)  |
|                      | 2               | 1.99% (8,299)   | 7.52% (27,998)  | < 0.001 | 0.249 (0.243, 0.255) |
|                      | 3               | 0.85% (3,532)   | 4.68% (17,434)  | < 0.001 | 0.173 (0.167, 0.18)  |
|                      | Other/Unknown   | 0.97% (4,053)   | 1.13% (4,206)   | < 0.001 | 0.857 (0.82, 0.895)  |
| M Stage              | No metastases   | 98.3% (411,146) | 96.4% (359,170) | < 0.001 | 2.159 (2.097, 2.224) |
|                      | Micrometastases | 0.01% (23)      | 0.01% (27)      | = 0.396 | 0.759 (0.416, 1.374) |
|                      | Macrometastases | 0.89% (3,712)   | 2.40% (8,949)   | < 0.001 | 0.364 (0.35, 0.378)  |
|                      | Unknown         | 0.79% (3,302)   | 1.15% (4,298)   | < 0.001 | 0.682 (0.651, 0.714) |
| Overall Cancer Stage | 0               | 22.8% (95,328)  | 15.9% (59,157)  | < 0.001 | 1.564 (1.546, 1.582) |
|                      | 1               | 47.9% (200,217) | 30.3% (112,953) | < 0.001 | 2.11 (2.091, 2.13)   |
|                      | 2               | 23.3% (97,417)  | 32.8% (122,200) | < 0.001 | 0.622 (0.616, 0.628) |
|                      | 3               | 3.37% (14,075)  | 16.0% (59,639)  | < 0.001 | 0.183 (0.179, 0.186) |
|                      | 4               | 0.89% (3,713)   | 2.40% (8,955)   | < 0.001 | 0.364 (0.35, 0.378)  |
|                      | Unknown         | 1.78% (7,433)   | 2.56% (9,540)   | < 0.001 | 0.688 (0.668, 0.71)  |

Abbreviations: No., number; SEER, Surveillance, Epidemiology, and End Results Program

**eTable 9: NCDB Demographics for Lumpectomy and Mastectomy Patients (2005–2017)**

| Variable          |                                        | Lumpectomy        | Mastectomy      | p-value | Odds Ratio (95% CI)  |
|-------------------|----------------------------------------|-------------------|-----------------|---------|----------------------|
| Age               | <40                                    | 2.36% (29,861)    | 7.37% (76,922)  | < 0.001 | 0.304 (0.3, 0.308)   |
|                   | 40–49                                  | 13.8% (174,748)   | 20.9% (218,338) | < 0.001 | 0.606 (0.602, 0.61)  |
|                   | 50–59                                  | 24.7% (311,905)   | 25.3% (263,376) | < 0.001 | 0.97 (0.964, 0.976)  |
|                   | 60–69                                  | 29.2% (369,309)   | 23.6% (246,496) | < 0.001 | 1.334 (1.327, 1.342) |
|                   | 70–79                                  | 20.4% (258,245)   | 15.2% (158,360) | < 0.001 | 1.435 (1.425, 1.445) |
|                   | ≥80                                    | 9.47% (119,665)   | 7.64% (79,654)  | < 0.001 | 1.265 (1.253, 1.277) |
| Race              | White                                  | 84.0% (1,061,740) | 82.6% (861,280) | < 0.001 | 1.11 (1.102, 1.118)  |
|                   | Black/African American                 | 10.8% (136,346)   | 11.4% (119,219) | < 0.001 | 0.937 (0.93, 0.945)  |
|                   | Asian/Pacific Islander                 | 3.15% (39,827)    | 3.92% (40,932)  | < 0.001 | 0.797 (0.786, 0.808) |
|                   | American Indian, Aleutian, or Eskimo   | 0.25% (3,145)     | 0.29% (3,106)   | < 0.001 | 0.835 (0.795, 0.878) |
|                   | Other/Unknown                          | 1.79% (22,675)    | 1.78% (18,609)  | < 0.001 | 1.006 (0.986, 1.036) |
| Ethnicity         | Hispanic/Spanish                       | 4.97% (62,745)    | 4.63% (58,453)  | < 0.001 | 0.855 (0.845, 0.865) |
|                   | Non-Hispanic/Spanish                   | 90.4% (1,142,535) | 89.4% (932,497) | < 0.001 | 1.119 (1.109, 1.128) |
|                   | Unknown                                | 4.63% (58,453)    | 4.85% (50,555)  | < 0.001 | 0.952 (0.941, 0.964) |
| Facility Type     | Academic/Research Program              | 29.8% (376,160)   | 28.8% (300,844) | < 0.001 | 1.046 (1.04, 1.052)  |
|                   | Community Center                       | 9.28% (117,266)   | 8.19% (85,519)  | < 0.001 | 1.145 (1.135, 1.156) |
|                   | Comprehensive Community Cancer Program | 44.2% (558,028)   | 41.8% (436,006) | < 0.001 | 1.101 (1.095, 1.107) |
|                   | Integrated Network Cancer Programs     | 14.4% (182,418)   | 13.8% (143,855) | < 0.001 | 1.055 (1.047, 1.062) |
|                   | Unknown                                | 2.36% (29,861)    | 7.37% (76,922)  | < 0.001 | 0.304 (0.3, 0.308)   |
| Facility Location | East North Central                     | 17.6% (222,016)   | 15.5% (161,843) | < 0.001 | 1.161 (1.152, 1.169) |
|                   | East South Central                     | 5.40% (68,238)    | 6.99% (72,870)  | < 0.001 | 0.76 (0.752, 0.768)  |

|                         |                                |                   |                 |         |                      |
|-------------------------|--------------------------------|-------------------|-----------------|---------|----------------------|
|                         | Middle Atlantic                | 16.3% (206,429)   | 12.9% (134,682) | < 0.001 | 1.317 (1.307, 1.327) |
|                         | Mountain                       | 4.43% (55,921)    | 4.42% (46,149)  | = 0.972 | 1 (0.988, 1.013)     |
|                         | New England                    | 6.87% (86,805)    | 4.52% (47,161)  | < 0.001 | 1.558 (1.54, 1.576)  |
|                         | Pacific                        | 11.9% (150,064)   | 10.9% (113,712) | < 0.001 | 1.101 (1.092, 1.11)  |
|                         | South Atlantic                 | 21.6% (272,778)   | 21.1% (219,764) | < 0.001 | 1.031 (1.025, 1.038) |
|                         | West North Central             | 6.68% (84,431)    | 7.65% (79,825)  | < 0.001 | 0.864 (0.855, 0.873) |
|                         | West South Central             | 6.89% (87,190)    | 8.65% (90,218)  | < 0.001 | 0.783 (0.775, 0.79)  |
|                         | Unknown                        | 2.36% (29,861)    | 7.37% (76,922)  | < 0.001 | 0.304 (0.3, 0.308)   |
| Area Population Density | Metro                          | 85.9% (1,085,604) | 83.9% (876,072) | < 0.001 | 1.162 (1.154, 1.171) |
|                         | Urban                          | 10.5% (132,190)   | 11.8% (123,221) | < 0.001 | 0.872 (0.865, 0.879) |
|                         | Rural                          | 1.23% (15,498)    | 1.56% (16,279)  | < 0.001 | 0.783 (0.766, 0.801) |
|                         | Unknown                        | 2.41% (30,441)    | 2.64% (27,574)  | < 0.001 | 0.909 (0.894, 0.924) |
| Insurance/Payor         | Private Insurance/Managed Care | 50.9% (64,4370)   | 56.0% (584,266) | < 0.001 | 0.817 (0.813, 0.821) |
|                         | Medicaid                       | 4.86% (61,392)    | 6.79% (70,909)  | < 0.001 | 0.7 (0.692, 0.708)   |
|                         | Medicare                       | 40.3% (509,286)   | 32.3% (337,205) | < 0.001 | 1.413 (1.406, 1.421) |
|                         | Other Government               | 0.94% (11,824)    | 1.09% (11,392)  | < 0.001 | 0.855 (0.834, 0.878) |
|                         | Not Insured                    | 1.49% (18,771)    | 2.05% (21,425)  | < 0.001 | 0.719 (0.705, 0.733) |
| Median Income Quartile  | <\$38,000                      | 12.5% (157,933)   | 14.2% (147,592) | < 0.001 | 0.867 (0.86, 0.873)  |
|                         | \$38,000–\$47,999              | 18.5% (234,214)   | 19.5% (203,234) | < 0.001 | 0.94 (0.934, 0.946)  |
|                         | \$48,000–\$62,999              | 23.9% (303,040)   | 23.9% (250,095) | = 0.935 | 1 (0.994, 1.006)     |
|                         | >\$63,000                      | 35.3% (445,711)   | 33.4% (348,026) | < 0.001 | 1.088 (1.082, 1.094) |
|                         | Unknown                        | 9.72% (122,835)   | 9.03% (94,199)  | < 0.001 | 1.085 (1.075, 1.094) |
| Charlson-Deyo           | 0                              | 84.6% (1,069,513) | 83.2% (868,065) | < 0.001 | 1.111 (1.103, 1.119) |

|                      |                              |                   |                 |         |                      |
|----------------------|------------------------------|-------------------|-----------------|---------|----------------------|
| Comorbidity Index    | 1                            | 12.1% (153,365)   | 13.2% (137,450) | < 0.001 | 0.91 (0.903, 0.917)  |
|                      | 2                            | 2.38% (30,084)    | 2.65% (27,649)  | < 0.001 | 0.896 (0.881, 0.911) |
|                      | 3+                           | 0.85% (10,771)    | 0.96% (9,982)   | < 0.001 | 0.89 (0.866, 0.915)  |
| Tumor Behavior       | Invasive/Malignant           | 77.4% (977,674)   | 84.0% (876,668) | < 0.001 | 0.649 (0.645, 0.653) |
|                      | In situ                      | 22.6% (286,059)   | 15.9% (166,478) | < 0.001 | 1.541 (1.53, 1.551)  |
| Tumor Grade          | 1                            | 23.7% (298,972)   | 15.1% (157,530) | < 0.001 | 1.742 (1.73, 1.754)  |
|                      | 2                            | 39.4% (497,385)   | 39.4% (411,172) | = 0.369 | 0.998 (0.992, 1.003) |
|                      | 3                            | 25.9% (326,784)   | 35.3% (367,909) | < 0.001 | 0.64 (0.637, 0.644)  |
|                      | 4                            | 0.59% (7,492)     | 0.74% (7,683)   | < 0.001 | 0.804 (0.778, 0.83)  |
|                      | Unknown                      | 10.5% (133,100)   | 9.48% (98,852)  | < 0.001 | 1.125 (1.115, 1.134) |
| Histology            | Ductal and Lobular Neoplasms | 91.9% (1,161,075) | 93.6% (976,637) | < 0.001 | 0.77 (0.762, 0.778)  |
|                      | Adenomas and Adenocarcinomas | 4.88% (61,619)    | 3.06% (31,896)  | < 0.001 | 1.625 (1.603, 1.648) |
|                      | Epithelial Neoplasms NOS     | 0.45% (5,656)     | 0.68% (7,100)   | < 0.001 | 0.656 (0.633, 0.679) |
|                      | Squamous Cell Neoplasms      | 0.42% (5,289)     | 0.29% (3,086)   | < 0.001 | 1.416 (1.355, 1.481) |
|                      | Neoplasms NOS                | 0.06% (729)       | 0.08% (876)     | < 0.001 | 0.687 (0.622, 0.759) |
|                      | Other                        | 2.32% (29,365)    | 2.26% (23,551)  | = 0.001 | 1.03 (1.012, 1.048)  |
| Radiation-Surgery    | Neoadjuvant                  | 0.30% (3,820)     | 0.39% (4,094)   | < 0.001 | 0.77 (0.736, 0.804)  |
| Sequence             | Adjuvant                     | 74.8% (945,357)   | 23.8% (248,538) | < 0.001 | 9.493 (9.434, 9.551) |
|                      | None                         | 23.4% (295,328)   | 74.7% (778,664) | < 0.001 | 0.104 (0.103, 0.104) |
|                      | Other/Unknown                | 1.52% (19,228)    | 1.14% (11,850)  | < 0.001 | 1.345 (1.314, 1.376) |
| Chemotherapy-Surgery | Neoadjuvant                  | 3.41% (43,075)    | 8.15% (84,988)  | < 0.001 | 0.398 (0.393, 0.403) |
| Sequence             | Adjuvant                     | 61.8% (780,947)   | 52.4% (547,141) | < 0.001 | 1.466 (1.459, 1.474) |
|                      | None                         | 23.4% (296,025)   | 23.3% (243,219) | = 0.052 | 1.006 (1, 1.012)     |

|                     |                               |                   |                 |         |                      |
|---------------------|-------------------------------|-------------------|-----------------|---------|----------------------|
|                     | Other/Unknown                 | 11.4% (143,686)   | 16.1% (167,798) | < 0.001 | 0.669 (0.664, 0.674) |
| ER Status           | Positive                      | 79.2% (1,001,134) | 73.8% (769,350) | < 0.001 | 1.357 (1.349, 1.365) |
| PR Status           | Positive                      | 69.2% (874,013)   | 62.9% (656,070) | < 0.001 | 1.323 (1.316, 1.33)  |
| HER2 Status         | Positive                      | 6.36% (80,312)    | 9.98% (104,108) | < 0.001 | 0.612 (0.606, 0.618) |
| Hormonal Status     | Triple Negative               | 5.68% (71,888)    | 7.52% (78,396)  | < 0.001 | 0.742 (0.735, 0.75)  |
| Combination Results | ER/PR Positive, HER2 Negative | 35.7% (450,733)   | 31.3% (326,619) | < 0.001 | 1.216 (1.21, 1.223)  |
|                     | Triple Positive               | 3.39% (42,918)    | 4.71% (49,094)  | < 0.001 | 0.712 (0.702, 0.721) |
| Clinical T Stage    | 0                             | 0.34% (4,298)     | 0.51% (5,311)   | < 0.001 | 0.667 (0.64, 0.694)  |
|                     | In Situ                       | 18.8% (237,942)   | 13.9% (145,849) | < 0.001 | 1.427 (1.417, 1.437) |
|                     | 1                             | 48.1% (607,972)   | 32.1% (334,453) | < 0.001 | 1.965 (1.954, 1.975) |
|                     | 2                             | 13.4% (169,757)   | 22.6% (235,705) | < 0.001 | 0.532 (0.528, 0.535) |
|                     | 3                             | 1.04% (13,192)    | 6.38% (66,542)  | < 0.001 | 0.155 (0.152, 0.158) |
|                     | 4                             | 0.40% (5,101)     | 4.14% (43,179)  | < 0.001 | 0.094 (0.091, 0.097) |
|                     | Unknown                       | 17.8% (225,471)   | 20.3% (212,107) | < 0.001 | 0.851 (0.845, 0.856) |
| Clinical N Stage    | 0                             | 78.4% (990,425)   | 63.9% (667,233) | < 0.001 | 2.042 (2.03, 2.053)  |
|                     | Micrometastases               | 0.00% (5)         | 0.00% (14)      | = 0.019 | 0.295 (0.083, 0.866) |
|                     | 1                             | 5.09% (64,418)    | 13.4% (139,791) | < 0.001 | 0.347 (0.344, 0.351) |
|                     | 2                             | 0.66% (8,278)     | 2.75% (28,723)  | < 0.001 | 0.233 (0.227, 0.239) |
|                     | 3                             | 0.29% (3,724)     | 1.62% (16,884)  | < 0.001 | 0.18 (0.173, 0.186)  |
|                     | Other/Unknown                 | 15.6% (196,883)   | 18.3% (190,501) | < 0.001 | 0.826 (0.82, 0.832)  |
| Clinical M Stage    | No metastases                 | 90.6% (1,144,275) | 89.1% (928,924) | < 0.001 | 1.178 (1.168, 1.188) |
|                     | Micrometastases               | 0.01% (112)       | 0.01% (104)     | = 0.412 | 0.889 (0.675, 1.172) |
|                     | Macrometastases               | 0.58% (7,375)     | 1.76% (18,394)  | < 0.001 | 0.327 (0.318, 0.336) |
|                     | Unknown                       | 8.86% (111,971)   | 9.18% (95,724)  | < 0.001 | 0.962 (0.954, 0.971) |

|                         |         |                 |                 |         |                      |
|-------------------------|---------|-----------------|-----------------|---------|----------------------|
| Overall Clinical Cancer | 0       | 19.9% (252,620) | 14.9% (154,995) | < 0.001 | 1.432 (1.422, 1.442) |
| Stage                   | 1       | 45.7% (577,967) | 28.7% (299,668) | < 0.001 | 2.091 (2.079, 2.103) |
|                         | 2       | 15.1% (190,867) | 25.8% (269,134) | < 0.001 | 0.512 (0.508, 0.515) |
|                         | 3       | 1.51% (19,114)  | 9.00% (93,904)  | < 0.001 | 0.155 (0.153, 0.158) |
|                         | 4       | 0.57% (7,196)   | 1.78% (18,511)  | < 0.001 | 0.317 (0.308, 0.326) |
|                         | Unknown | 17.1% (215,969) | 19.8% (206,934) | < 0.001 | 0.833 (0.827, 0.839) |

Abbreviations: No., number; NCDB, National Cancer Database

**eTable 10: NSQIP Demographics for Unilateral Mastectomy and Contralateral Mastectomy Patients (2005–2017)**

| Variable         |                                  | Unilateral Mastectomy | Contralateral Prophylactic Mastectomy | p-value | Odds Ratio (95% CI)  |
|------------------|----------------------------------|-----------------------|---------------------------------------|---------|----------------------|
| Age              | <40                              | 7.33% (7,396)         | 13.4% (4,728)                         | < 0.001 | 0.511 (0.492, 0.532) |
|                  | 40–49                            | 19.2% (19,389)        | 30.4% (10,723)                        | < 0.001 | 0.545 (0.53, 0.561)  |
|                  | 50–59                            | 25.2% (25,413)        | 29.2% (10,309)                        | < 0.001 | 0.816 (0.794, 0.839) |
|                  | 60–69                            | 24.3% (24,563)        | 19.3% (6,802)                         | < 0.001 | 1.348 (1.308, 1.39)  |
|                  | 70–79                            | 15.7% (15,874)        | 6.56% (2,315)                         | < 0.001 | 2.66 (2.542, 2.785)  |
|                  | ≥80                              | 8.20% (8,277)         | 1.21% (428)                           | < 0.001 | 7.281 (6.6, 8.048)   |
| Race             | White                            | 69.8% (70,577)        | 77.6% (27,409)                        | < 0.001 | 0.666 (0.647, 0.685) |
|                  | Black/African American           | 11.1% (11,204)        | 7.63% (2,694)                         | < 0.001 | 1.508 (1.443, 1.577) |
|                  | Asian or Pacific Islander        | 5.80% (5,867)         | 3.60% (1,272)                         | < 0.001 | 1.648 (1.549, 1.755) |
|                  | American Indian or Alaska Native | 0.56% (569)           | 0.32% (112)                           | < 0.001 | 1.778 (1.449, 2.198) |
|                  | Other/Unknown                    | 12.8% (12,914)        | 10.8% (3,825)                         | < 0.001 | 1.205 (1.16, 1.252)  |
| Ethnicity        | Hispanic/Spanish                 | 5.89% (5,963)         | 5.08% (1,793)                         | < 0.001 | 1.171 (1.109, 1.237) |
|                  | Non-Hispanic/Spanish             | 83.7% (84,599)        | 86.2% (30,434)                        | < 0.001 | 0.82 (0.792, 0.849)  |
|                  | Unknown                          | 10.5% (10,569)        | 8.74% (3,085)                         | < 0.001 | 1.219 (1.169, 1.272) |
| Procedure Status | Inpatient                        | 56.9% (57,520)        | 63.7% (22,502)                        | < 0.001 | 0.751 (0.732, 0.77)  |
|                  | Outpatient                       | 43.1% (43,611)        | 36.3% (12,810)                        | < 0.001 | 1.332 (1.299, 1.366) |
| ASA              | 1                                | 5.51% (5,569)         | 7.16% (2,525)                         | < 0.001 | 0.757 (0.721, 0.795) |
| Classification   | 2                                | 57.9% (58,537)        | 64.2% (22,635)                        | < 0.001 | 0.769 (0.75, 0.789)  |
|                  | 3                                | 34.9% (35,239)        | 27.9% (9,868)                         | < 0.001 | 1.379 (1.343, 1.417) |
|                  | 4                                | 1.65% (1,670)         | 0.70% (247)                           | < 0.001 | 2.384 (2.083, 2.737) |
|                  | 5                                | 0.00% (3)             | 0.00% (0)                             | = 0.573 | NA (0.144, NA)       |

\*As NSQIP patients with missing age data were still included, total number of patients is lower based on age variable compared to race and ethnicity. Abbreviations: No., number; NSQIP, National Surgical Quality Improvement Program

**eTable 11: SEER Demographics for Unilateral Mastectomy and Contralateral Mastectomy Patients (2005–2017)**

| Variable        |                                  | Unilateral Mastectomy | Contralateral Prophylactic Mastectomy | P-value | Odds Ratio (95% CI)  |
|-----------------|----------------------------------|-----------------------|---------------------------------------|---------|----------------------|
| Age             | <40                              | 4.84% (11,564)        | 12.7% (11,554)                        | < 0.001 | 0.349 (0.339, 0.358) |
|                 | 40–49                            | 16.7% (40,031)        | 30.7% (27,865)                        | < 0.001 | 0.454 (0.446, 0.462) |
|                 | 50–59                            | 23.7% (56,611)        | 28.7% (26,052)                        | < 0.001 | 0.771 (0.758, 0.784) |
|                 | 60–69                            | 25.2% (60,124)        | 19.6% (17,807)                        | < 0.001 | 1.377 (1.351, 1.403) |
|                 | 70–79                            | 18.8% (44,827)        | 6.89% (6,250)                         | < 0.001 | 3.121 (3.036, 3.209) |
|                 | ≥80                              | 10.8% (25,917)        | 1.38% (1,253)                         | < 0.001 | 8.688 (8.205, 9.206) |
| Race            | White                            | 76.3% (182,324)       | 83.9% (76,172)                        | < 0.001 | 0.616 (0.604, 0.629) |
|                 | Black                            | 11.9% (28,602)        | 8.64% (7,845)                         | < 0.001 | 1.437 (1.399, 1.475) |
|                 | Asian or Pacific Islander        | 10.8% (25,754)        | 6.39% (5,805)                         | < 0.001 | 1.767 (1.716, 1.821) |
|                 | American Indian or Alaska Native | 0.59% (1,414)         | 0.58% (530)                           | = 0.819 | 1.013 (0.916, 1.122) |
|                 | Other/Unknown                    | 0.41% (980)           | 0.47% (429)                           | = 0.015 | 0.867 (0.773, 0.974) |
| Ethnicity       | Hispanic/Spanish                 | 11.7% (27,897)        | 9.78% (8,876)                         | < 0.001 | 1.219 (1.189, 1.25)  |
|                 | Non-Hispanic/Spanish             | 88.3% (211,177)       | 90.2% (81,905)                        | < 0.001 | 0.82 (0.8, 0.841)    |
| Area Population | Metro                            | 88.4% (211,226)       | 90.3% (81,996)                        | < 0.001 | 0.813 (0.792, 0.834) |
| Density         | Urban                            | 6.69% (15,990)        | 5.66% (5,137)                         | < 0.001 | 1.195 (1.157, 1.235) |
|                 | Rural                            | 4.82% (11,514)        | 3.92% (3,554)                         | < 0.001 | 1.242 (1.195, 1.291) |
|                 | Unknown/Alaska/Hawaii            | 0.14% (344)           | 0.10% (94)                            | = 0.004 | 1.39 (1.103, 1.766)  |
| Median Income   | <\$40,000                        | 4.96% (11,848)        | 3.79% (3,438)                         | < 0.001 | 1.325 (1.274, 1.377) |
| Quartile        | \$40,000–\$49,999                | 12.6% (30,158)        | 9.85% (8,939)                         | < 0.001 | 1.322 (1.289, 1.355) |
|                 | \$50,000–\$59,999                | 18.3% (43,643)        | 19.4% (17,598)                        | < 0.001 | 0.929 (0.911, 0.947) |
|                 | \$60,000–\$69,999                | 28.5% (68,089)        | 29.8% (27,044)                        | < 0.001 | 0.939 (0.923, 0.954) |
|                 | >\$70,000                        | 35.7% (85,315)        | 37.2% (33,747)                        | < 0.001 | 0.938 (0.923, 0.953) |

|                     |                               |                 |                |         |                      |
|---------------------|-------------------------------|-----------------|----------------|---------|----------------------|
|                     | Unknown                       | 0.01% (21)      | 0.02% (15)     | = 0.063 | 0.532 (0.261, 1.109) |
| Tumor Behavior      | Malignant                     | 85.7% (204,915) | 82.3% (74,708) | < 0.001 | 1.291 (1.264, 1.317) |
|                     | In situ                       | 14.3% (34,159)  | 17.7% (16,073) | < 0.001 | 0.775 (0.759, 0.791) |
| Tumor Grade         | 1                             | 15.5% (36,935)  | 14.9% (13,517) | < 0.001 | 1.044 (1.022, 1.067) |
|                     | 2                             | 40.5% (96,750)  | 39.5% (35,819) | < 0.001 | 1.043 (1.027, 1.06)  |
|                     | 3                             | 35.7% (85,431)  | 36.9% (33,502) | < 0.001 | 0.951 (0.936, 0.966) |
|                     | 4                             | 1.88% (4,489)   | 1.49% (1,349)  | < 0.001 | 1.269 (1.193, 1.35)  |
|                     | Unknown                       | 6.47% (15,469)  | 7.26% (6,594)  | < 0.001 | 0.883 (0.857, 0.91)  |
| Histology           | Ductal and Lobular Neoplasms  | 93.2% (222,792) | 94.1% (85,400) | < 0.001 | 0.862 (0.835, 0.89)  |
|                     | Adenomas and Adenocarcinomas  | 2.93% (7,004)   | 3.39% (3,075)  | < 0.001 | 0.861 (0.824, 0.899) |
|                     | Epithelial Neoplasms NOS      | 0.61% (1,455)   | 0.63% (575)    | = 0.425 | 0.961 (0.871, 1.06)  |
|                     | Squamous Cell Neoplasms       | 0.23% (553)     | 0.14% (128)    | < 0.001 | 1.642 (1.352, 2.006) |
|                     | Neoplasms NOS                 | 0.06% (148)     | 0.09% (82)     | = 0.008 | 0.685 (0.52, 0.909)  |
|                     | Other                         | 2.98% (7,122)   | 1.68% (1,521)  | < 0.001 | 1.802 (1.704, 1.907) |
| ER Status           | Positive                      | 74.0% (176,944) | 74.4% (67,509) | = 0.039 | 0.982 (0.965, 0.999) |
| PR Status           | Positive                      | 61.6% (147,354) | 63.8% (57,921) | < 0.001 | 0.911 (0.897, 0.926) |
| HER2 Status         | Positive                      | 8.49% (20,308)  | 11.7% (10,588) | < 0.001 | 0.703 (0.686, 0.721) |
| Hormonal Status     | Triple Negative               | 5.71% (13,653)  | 8.33% (7,558)  | < 0.001 | 0.667 (0.648, 0.687) |
| Combination Results | ER/PR Positive, HER2 Negative | 28.2% (67,455)  | 33.4% (30,361) | < 0.001 | 0.782 (0.769, 0.795) |
|                     | Triple Positive               | 3.85% (9,205)   | 5.77% (5,236)  | < 0.001 | 0.654 (0.632, 0.678) |
| T Stage             | 0                             | 0.09% (237)     | 0.16% (143)    | < 0.001 | 0.629 (0.509, 0.78)  |
|                     | In Situ                       | 14.5% (34,653)  | 17.8% (16,198) | < 0.001 | 0.781 (0.765, 0.797) |
|                     | 1                             | 38.8% (92,672)  | 42.2% (38,308) | < 0.001 | 0.867 (0.854, 0.881) |
|                     | 2                             | 30.8% (73,566)  | 27.4% (24,895) | < 0.001 | 1.176 (1.157, 1.197) |

|                      |                 |                 |                |         |                      |
|----------------------|-----------------|-----------------|----------------|---------|----------------------|
|                      | 3               | 8.67% (20,719)  | 7.58% (6,879)  | < 0.001 | 1.157 (1.125, 1.191) |
|                      | 4               | 5.44% (13,002)  | 3.02% (2,740)  | < 0.001 | 1.848 (1.772, 1.928) |
|                      | Unknown         | 1.77% (4,225)   | 1.78% (1,618)  | = 0.768 | 0.991 (0.935, 1.051) |
| N Stage              | 0               | 61.7% (147,473) | 65.9% (59,902) | < 0.001 | 0.83 (0.817, 0.843)  |
|                      | Micrometastases | 4.01% (9,578)   | 4.01% (3,639)  | = 0.976 | 0.999 (0.961, 1.039) |
|                      | 1               | 19.7% (47,057)  | 19.6% (17,753) | = 0.413 | 1.008 (0.989, 1.028) |
|                      | 2               | 8.40% (20,087)  | 6.16% (5,593)  | < 0.001 | 1.397 (1.355, 1.441) |
|                      | 3               | 5.33% (12,740)  | 3.52% (3,197)  | < 0.001 | 1.542 (1.482, 1.605) |
|                      | Other/Unknown   | 0.89% (2,139)   | 0.77% (697)    | < 0.001 | 1.167 (1.07, 1.273)  |
| M Stage              | No metastases   | 96.3% (230,179) | 97.6% (88,625) | < 0.001 | 0.63 (0.6, 0.66)     |
|                      | Micrometastases | 0.01% (11)      | 0.01% (10)     | = 0.049 | 0.418 (0.161, 1.097) |
|                      | Macrometastases | 2.63% (6,293)   | 1.68% (1,527)  | < 0.001 | 1.58 (1.493, 1.673)  |
|                      | Unknown         | 1.08% (2,591)   | 0.68% (619)    | < 0.001 | 1.596 (1.461, 1.746) |
| Overall Cancer Stage | 0               | 14.5% (34,649)  | 17.8% (16,191) | < 0.001 | 0.781 (0.765, 0.797) |
|                      | 1               | 29.5% (70,403)  | 32.5% (29,472) | < 0.001 | 0.868 (0.854, 0.883) |
|                      | 2               | 33.5% (80,117)  | 32.4% (29,424) | < 0.001 | 1.051 (1.034, 1.068) |
|                      | 3               | 17.6% (42,067)  | 13.6% (12,365) | < 0.001 | 1.354 (1.325, 1.384) |
|                      | 4               | 2.63% (6,298)   | 1.68% (1,527)  | < 0.001 | 1.581 (1.494, 1.674) |
|                      | Unknown         | 2.32% (5,540)   | 1.99% (1,802)  | < 0.001 | 1.171 (1.11, 1.237)  |

Abbreviations: No., number; SEER, Surveillance, Epidemiology, and End Results Program

**eTable 12: NCDB Demographics for Unilateral Mastectomy and Contralateral Mastectomy Patients (2005–2017)**

| Variable      |                                      | Unilateral Mastectomy | Contralateral Prophylactic Mastectomy | P-value | Odds Ratio (95% CI)  |
|---------------|--------------------------------------|-----------------------|---------------------------------------|---------|----------------------|
| Age           | <40                                  | 5.07% (29,536)        | 12.9% (37,469)                        | < 0.001 | 0.362 (0.356, 0.368) |
|               | 40–49                                | 16.9% (99,021)        | 30.4% (88,577)                        | < 0.001 | 0.469 (0.464, 0.474) |
|               | 50–59                                | 23.9% (139,399)       | 28.8% (83,871)                        | < 0.001 | 0.779 (0.771, 0.786) |
|               | 60–69                                | 25.4% (147,813)       | 19.7% (57,420)                        | < 0.001 | 1.386 (1.371, 1.401) |
|               | 70–79                                | 18.5% (107,951)       | 6.99% (20,393)                        | < 0.001 | 3.023 (2.976, 3.072) |
|               | ≥80                                  | 10.1% (58,891)        | 1.29% (3,764)                         | < 0.001 | 8.597 (8.316, 8.891) |
| Race          | White                                | 80.9% (471,316)       | 86.9% (253,440)                       | < 0.001 | 0.636 (0.628, 0.644) |
|               | Black                                | 12.7% (73,725)        | 8.28% (24,132)                        | < 0.001 | 1.605 (1.581, 1.63)  |
|               | Asian/Pacific Islander               | 4.45% (25,922)        | 2.77% (8,073)                         | < 0.001 | 1.635 (1.581, 1.63)  |
|               | American Indian, Aleutian, or Eskimo | 0.30% (1,769)         | 0.27% (792)                           | = 0.009 | 1.118 (1.027, 1.217) |
|               | Other/Unknown                        | 1.70% (9,879)         | 1.74% (5,057)                         | = 0.183 | 0.977 (0.944, 1.011) |
| Ethnicity     | Hispanic/Spanish                     | 6.01% (35,031)        | 4.86% (14,157)                        | < 0.001 | 1.253 (1.228, 1.279) |
|               | Non-Hispanic/Spanish                 | 89.2% (519,839)       | 90.8% (264,563)                       | < 0.001 | 0.843 (0.83, 0.856)  |
|               | Unknown                              | 4.76% (27,741)        | 4.38% (12,774)                        | < 0.001 | 1.091 (1.068, 1.115) |
| Facility Type | Academic/Research Program            | 29.3% (170,419)       | 26.9% (78,483)                        | < 0.001 | 1.122 (1.111, 1.133) |

|                   |                                        |                 |                 |         |                      |
|-------------------|----------------------------------------|-----------------|-----------------|---------|----------------------|
|                   | Community Center                       | 8.75% (50,975)  | 5.94% (17,301)  | < 0.001 | 1.52 (1.493, 1.547)  |
|                   | Comprehensive Community Cancer Program | 42.9% (249,844) | 40.2% (117,170) | < 0.001 | 1.117 (1.107, 1.127) |
|                   | Integrated Network Cancer Programs     | 14.1% (81,837)  | 14.1% (41,071)  | = 0.584 | 0.996 (0.984, 1.009) |
|                   | Unknown                                | 5.07% (29,536)  | 12.9% (37,469)  | < 0.001 | 0.362 (0.356, 0.368) |
| Facility Location | East North Central                     | 16.6% (96,659)  | 12.9% (37,807)  | < 0.001 | 1.335 (1.318, 1.352) |
|                   | East South Central                     | 6.92% (40,330)  | 7.31% (21,321)  | < 0.001 | 0.942 (0.926, 0.959) |
|                   | Middle Atlantic                        | 13.5% (78,665)  | 11.3% (32,898)  | < 0.001 | 1.227 (1.21, 1.244)  |
|                   | Mountain                               | 4.08% (23,765)  | 5.15% (15,025)  | < 0.001 | 0.783 (0.766, 0.799) |
|                   | New England                            | 4.69% (27,327)  | 3.81% (11,104)  | < 0.001 | 1.243 (1.215, 1.271) |
|                   | Pacific                                | 11.8% (68,669)  | 9.93% (28,942)  | < 0.001 | 1.212 (1.195, 1.23)  |
|                   | South Atlantic                         | 21.6% (126,135) | 19.8% (57,821)  | < 0.001 | 1.117 (1.104, 1.129) |
|                   | West North Central                     | 7.74% (44,942)  | 8.82% (25,698)  | < 0.001 | 0.865 (0.851, 0.879) |
|                   | West South Central                     | 7.99% (46,583)  | 8.03% (23,409)  | = 0.569 | 0.995 (0.979, 1.012) |
|                   | Unknown                                | 5.07% (29,536)  | 12.9% (37,469)  | < 0.001 | 0.362 (0.356, 0.368) |
| Area Population   | Metro                                  | 83.8% (488,198) | 84.9% (247,411) | < 0.001 | 0.921 (0.91, 0.933)  |
| Density           | Urban                                  | 12.0% (70,011)  | 10.9% (32,008)  | < 0.001 | 1.107 (1.092, 1.123) |
|                   | Rural                                  | 1.66% (9,690)   | 1.45% (4,235)   | < 0.001 | 1.147 (1.106, 1.19)  |
|                   | Unknown                                | 2.53% (14,712)  | 2.69% (7,840)   | < 0.001 | 0.937 (0.912, 0.964) |

|                   |                                |                 |                 |         |                      |
|-------------------|--------------------------------|-----------------|-----------------|---------|----------------------|
| Insurance/Payor   | Private Insurance/Managed Care | 49.8% (290,194) | 72.9% (212,523) | < 0.001 | 0.369 (0.365, 0.372) |
|                   | Medicaid                       | 7.24% (42,200)  | 5.99% (17,478)  | < 0.001 | 1.224 (1.202, 1.247) |
|                   | Medicare                       | 38.7% (225,224) | 17.3% (50,406)  | < 0.001 | 3.014 (2.981, 3.048) |
|                   | Other Government               | 0.99% (5,803)   | 1.34% (3,894)   | < 0.001 | 0.743 (0.713, 0.774) |
|                   | Not Insured                    | 2.21% (12,855)  | 1.48% (4,310)   | < 0.001 | 1.503 (1.452, 1.557) |
| Median Income     | <\$38,000                      | 15.3% (89,161)  | 10.8% (31,454)  | < 0.001 | 1.494 (1.473, 1.514) |
| Quartile          | \$38,000–\$47,999              | 20.2% (117,502) | 17.6% (51,385)  | < 0.001 | 1.18 (1.167, 1.194)  |
|                   | \$48,000–\$62,999              | 24.2% (140,739) | 23.9% (69,688)  | = 0.010 | 1.014 (1.003, 1.024) |
|                   | >\$63,000                      | 31.7% (184,712) | 37.5% (109,224) | < 0.001 | 0.775 (0.768, 0.782) |
|                   | Unknown                        | 8.67% (50,497)  | 10.2% (29,743)  | < 0.001 | 0.835 (0.823, 0.848) |
| Charlson-Deyo     | 0                              | 81.1% (472,480) | 87.2% (254,051) | < 0.001 | 0.632 (0.624, 0.64)  |
| Comorbidity Index | 1                              | 14.6% (85,140)  | 10.6% (31,025)  | < 0.001 | 1.437 (1.417, 1.457) |
|                   | 2                              | 3.11% (18,095)  | 1.69% (4,918)   | < 0.001 | 1.868 (1.809, 1.929) |
|                   | 3+                             | 1.18% (6,896)   | 0.52% (1,500)   | < 0.001 | 2.316 (2.189, 2.451) |
| Tumor Behavior    | Invasive/Malignant             | 85.3% (497,153) | 82.7% (240,986) | < 0.001 | 1.219 (1.205, 1.234) |
|                   | In situ                        | 14.7% (85,458)  | 17.3% (50,508)  | < 0.001 | 0.82 (0.81, 0.83)    |
| Tumor Grade       | 1                              | 14.9% (87,302)  | 14.7% (42,896)  | = 0.001 | 1.021 (1.009, 1.034) |

|                   |                              |                 |                 |         |                      |
|-------------------|------------------------------|-----------------|-----------------|---------|----------------------|
|                   | 2                            | 40.1% (233,503) | 38.4% (111,994) | < 0.001 | 1.072 (1.062, 1.082) |
|                   | 3                            | 35.5% (207,045) | 36.6% (106,611) | < 0.001 | 0.956 (0.947, 0.965) |
|                   | 4                            | 0.82% (4,755)   | 0.66% (1,925)   | < 0.001 | 1.238 (1.174, 1.306) |
|                   | Unknown                      | 8.58% (50,006)  | 9.63% (28,068)  | < 0.001 | 0.881 (0.868, 0.895) |
| Histology         | Ductal and Lobular Neoplasms | 93.5% (544,880) | 94.3% (274,794) | < 0.001 | 0.878 (0.861, 0.894) |
|                   | Adenomas and Adenocarcinomas | 2.84% (16,532)  | 3.30% (9,625)   | < 0.001 | 0.855 (0.834, 0.877) |
|                   | Epithelial Neoplasms NOS     | 0.64% (3,754)   | 0.64% (1,862)   | = 0.766 | 1.009 (0.954, 1.067) |
|                   | Squamous Cell Neoplasms      | 0.32% (1,886)   | 0.19% (580)     | < 0.001 | 1.629 (1.483, 1.791) |
|                   | Neoplasms NOS                | 0.07% (377)     | 0.08% (222)     | = 0.056 | 0.85 (0.718, 1.007)  |
|                   | Other                        | 2.61% (15,182)  | 1.51% (4,411)   | < 0.001 | 1.741 (1.683, 1.802) |
| Radiation-Surgery | Neoadjuvant                  | 0.39% (2,313)   | 0.29% (870)     | < 0.001 | 1.332 (1.231, 1.441) |
| Sequence          | Adjuvant                     | 24.6% (143,182) | 23.6% (68,911)  | < 0.001 | 1.052 (1.042, 1.063) |
|                   | None                         | 73.9% (430,699) | 75.1% (218,926) | < 0.001 | 0.94 (0.93, 0.949)   |
|                   | Other/Unknown                | 1.10% (6,417)   | 0.96% (2,787)   | < 0.001 | 1.154 (1.103, 1.207) |
| Chemotherapy-     | Neoadjuvant                  | 7.25% (42,265)  | 9.97% (29,071)  | < 0.001 | 0.706 (0.695, 0.717) |
| Surgery Sequence  | Adjuvant                     | 54.1% (315,271) | 50.8% (148,058) | < 0.001 | 1.142 (1.132, 1.153) |

|                     |                               |                 |                 |         |                      |
|---------------------|-------------------------------|-----------------|-----------------|---------|----------------------|
|                     | None                          | 22.5% (131,313) | 23.5% (68,538)  | < 0.001 | 0.947 (0.937, 0.957) |
|                     | Other/Unknown                 | 16.1% (93,762)  | 15.7% (45,827)  | < 0.001 | 1.028 (1.016, 1.041) |
| ER Status           | Positive                      | 74.3% (433,055) | 73.5% (214,134) | < 0.001 | 1.046 (1.036, 1.057) |
| PR Status           | Positive                      | 62.9% (366,531) | 63.8% (185,918) | < 0.001 | 0.963 (0.954, 0.972) |
| HER2 Status         | Positive                      | 9.38% (54,642)  | 12.2% (35,492)  | < 0.001 | 0.747 (0.736, 0.757) |
| Hormonal Status     | Triple Negative               | 6.90% (40,215)  | 9.53% (27,785)  | < 0.001 | 0.704 (0.692, 0.715) |
| Combination Results | ER/PR Positive, HER2 Negative | 30.6% (178,324) | 34.5% (100,670) | < 0.001 | 0.836 (0.828, 0.844) |
|                     | Triple Positive               | 4.24% (24,681)  | 6.03% (17,583)  | < 0.001 | 0.689 (0.676, 0.703) |
| Clinical T Stage    | 0                             | 0.47% (2,746)   | 0.52% (1,522)   | = 0.001 | 0.902 (0.847, 0.961) |
|                     | In Situ                       | 12.9% (75,725)  | 15.8% (46,114)  | < 0.001 | 0.795 (0.785, 0.805) |
|                     | 1                             | 30.6% (178,368) | 35.8% (104,217) | < 0.001 | 0.793 (0.785, 0.8)   |
|                     | 2                             | 22.9% (133,496) | 23.4% (68,151)  | < 0.001 | 0.974 (0.964, 0.984) |
|                     | 3                             | 6.71% (39,106)  | 6.16% (17,967)  | < 0.001 | 1.095 (1.075, 1.116) |
|                     | 4                             | 4.82% (28,079)  | 2.88% (8,383)   | < 0.001 | 1.71 (1.668, 1.753)  |
|                     | Unknown                       | 21.5% (125,091) | 15.5% (45,140)  | < 0.001 | 1.492 (1.475, 1.51)  |
| Clinical N Stage    | 0                             | 62.5% (363,924) | 68.8% (200,416) | < 0.001 | 0.756 (0.749, 0.763) |
|                     | Micrometastases               | 0.00% (6)       | 0.00% (5)       | = 0.523 | 0.6 (0.153, 2.487)   |
|                     | 1                             | 13.6% (79,128)  | 14.2% (41,476)  | < 0.001 | 0.947 (0.935, 0.96)  |

|                  |                 |                 |                 |         |                      |
|------------------|-----------------|-----------------|-----------------|---------|----------------------|
|                  | 2               | 2.92% (17,023)  | 2.37% (6,904)   | < 0.001 | 1.241 (1.206, 1.276) |
|                  | 3               | 1.68% (9,784)   | 1.48% (4,310)   | < 0.001 | 1.138 (1.098, 1.18)  |
|                  | Other/Unknown   | 19.4% (112,746) | 13.2% (38,383)  | < 0.001 | 1.582 (1.563, 1.602) |
| Clinical M Stage | No metastases   | 88.7% (516,472) | 91.0% (265,325) | < 0.001 | 0.77 (0.759, 0.782)  |
|                  | Micrometastases | 0.01% (41)      | 0.01% (42)      | = 0.001 | 0.488 (0.31, 0.77)   |
|                  | Macrometastases | 1.98% (11,516)  | 1.22% (3,548)   | < 0.001 | 1.637 (1.575, 1.7)   |
|                  | Unknown         | 9.37% (54,582)  | 7.75% (22,579)  | < 0.001 | 1.231 (1.211, 1.251) |
| Overall Clinical | 0               | 13.7% (79,823)  | 16.7% (48,529)  | < 0.001 | 0.795 (0.785, 0.805) |
| Cancer Stage     | 1               | 27.4% (159,526) | 31.9% (92,913)  | < 0.001 | 0.806 (0.798, 0.814) |
|                  | 2               | 26.0% (151,702) | 26.8% (78,159)  | < 0.001 | 0.961 (0.951, 0.971) |
|                  | 3               | 9.60% (55,943)  | 8.10% (23,618)  | < 0.001 | 1.205 (1.186, 1.224) |
|                  | 4               | 1.99% (11,615)  | 1.22% (3,553)   | < 0.001 | 1.649 (1.587, 1.713) |
|                  | Unknown         | 21.3% (124,002) | 15.3% (44,722)  | < 0.001 | 1.492 (1.474, 1.51)  |

Abbreviations: No., number; NCDB, National Cancer Database
